# Supplementary material for: Ionic magnetic core–shell nanoparticles for DNA extraction
Source: Royal Society of Chemistry journal article supplement (doi:10.1039/d0ra05933a), 2020-01-01

## Ionic magnetic core-shell nanoparticles for DNA extraction

Tammar Hussein Ali,<sup>1,2\*</sup> Amar Mousa Mandal<sup>3</sup>, Thorsten Heidelberg,<sup>1\*</sup> Rusnah Syahila Duali Hussen<sup>1</sup>, and Ean Wai Goh<sup>1</sup>

<sup>1</sup> Chemistry Department, Faculty of Science, University of Malaya, 50603 Kuala Lumpur, Malaysia

<sup>2</sup> Faculty of Pharmacy, Al-Muthanna University, 66001 Samawah, Al Muthanna. Iraq.

<sup>3</sup> College of Basic education, Science department, Al-Muthanna University, 66001 Samawah, Al Muthanna. Iraq.

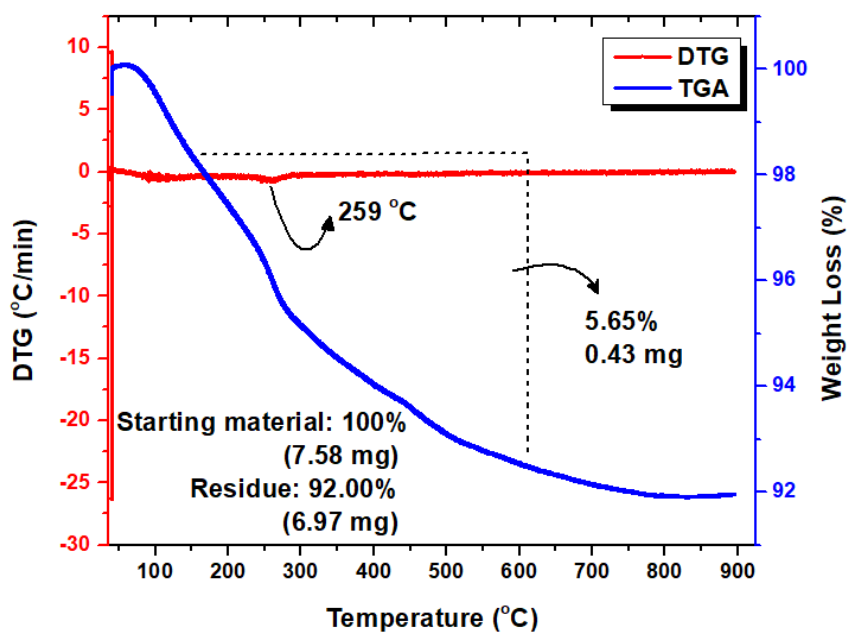

TG-DTA analysis of magnetic NpFeSi

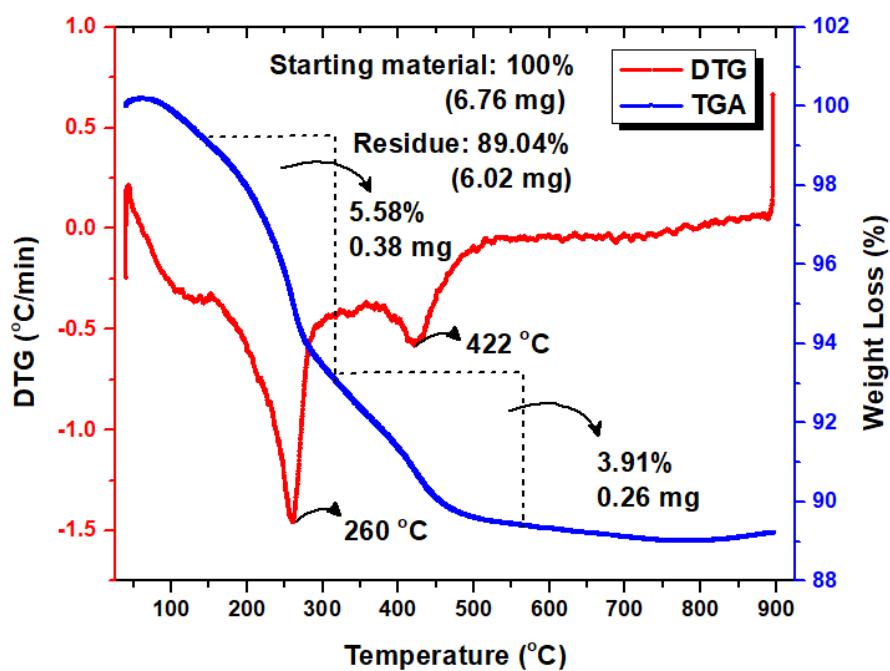

TG-DTA analysis of magnetic NpFeSiCl

## Ionic magnetic core-shell nanoparticles for DNA extraction

Tammar Hussein Ali,<sup>1,2\*</sup> Amar Mousa Mandal<sup>3</sup>, Thorsten Heidelberg,<sup>1\*</sup> Rusnah Syahila Duali Hussen<sup>1</sup>, and Ean Wai Goh<sup>1</sup>

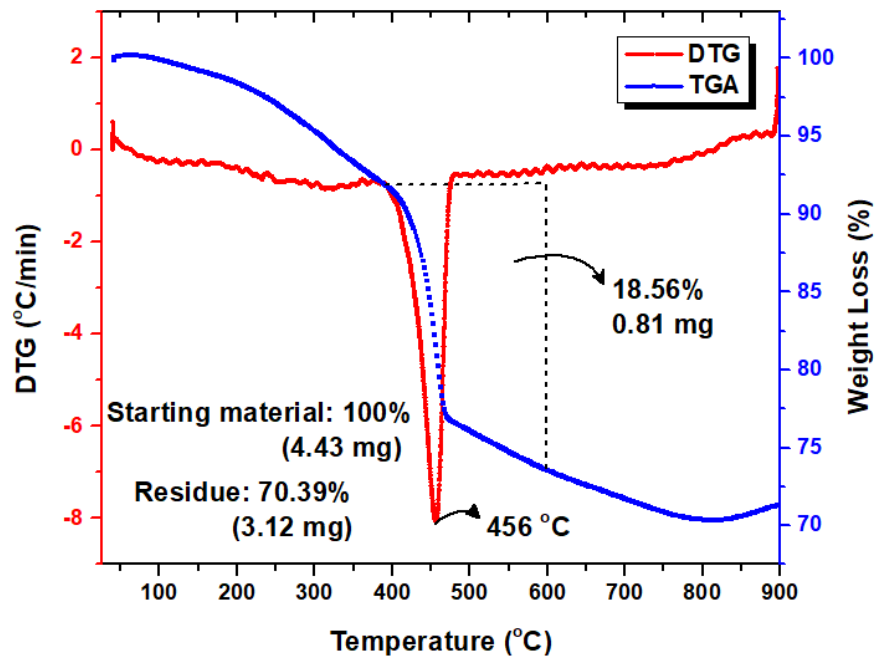

TG-DTA analysis of magnetic NpFeSi C12

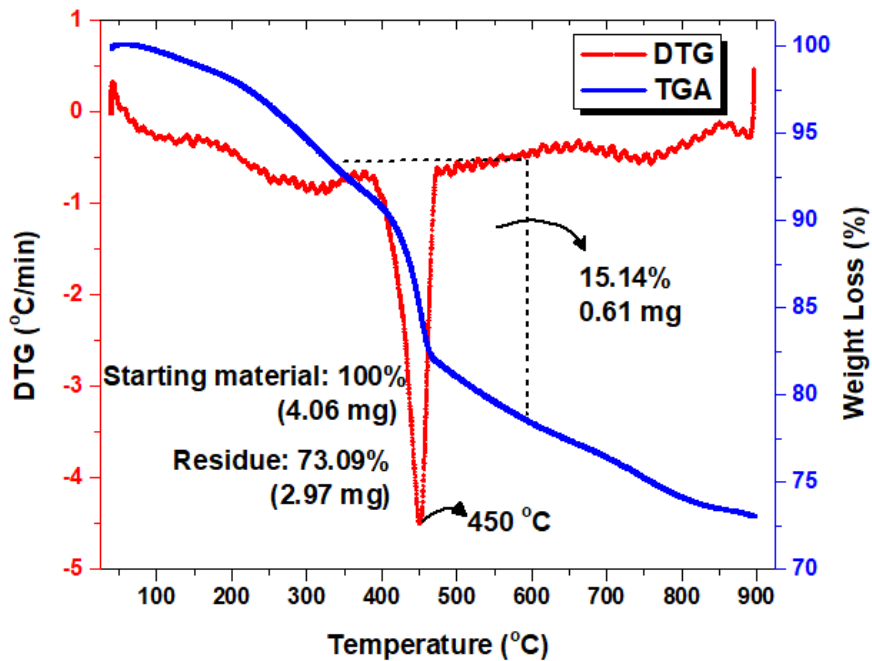

TG-DTA analysis of magnetic NpFeSi C10

## Ionic magnetic core-shell nanoparticles for DNA extraction

Tammar Hussein Ali,<sup>1,2\*</sup> Amar Mousa Mandal,<sup>3</sup> Thorsten Heidelberg,<sup>1\*</sup> Rusnah Syahila Duali Hussen<sup>1</sup>, and Ean Wai Goh<sup>1</sup>

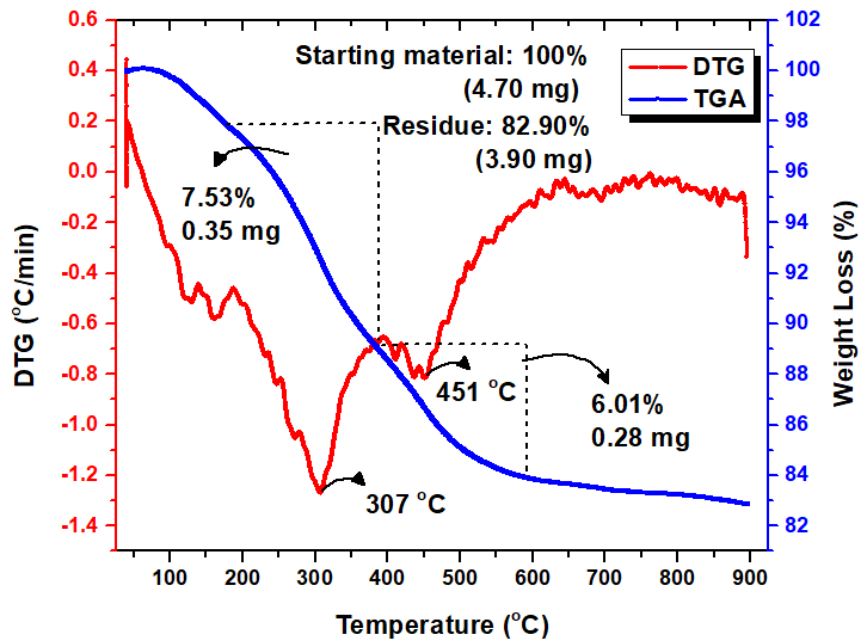

TG-DTA analysis of magnetic NpFeSi C8

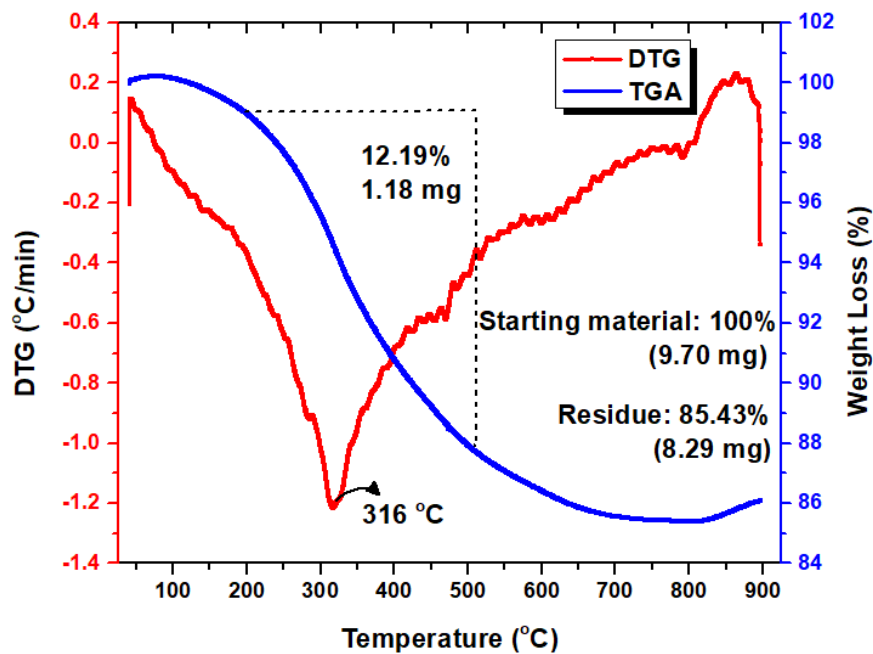

TG-DTA analysis of magnetic NpFeSi C4:8

## Ionic magnetic core-shell nanoparticles for DNA extraction

Tammar Hussein Ali,<sup>1,2\*</sup> Amar Mousa Mandal<sup>3</sup>, Thorsten Heidelberg,<sup>1\*</sup> Rusnah Syahila Duali Hussen<sup>1</sup>, and Ean Wai Goh<sup>1</sup>

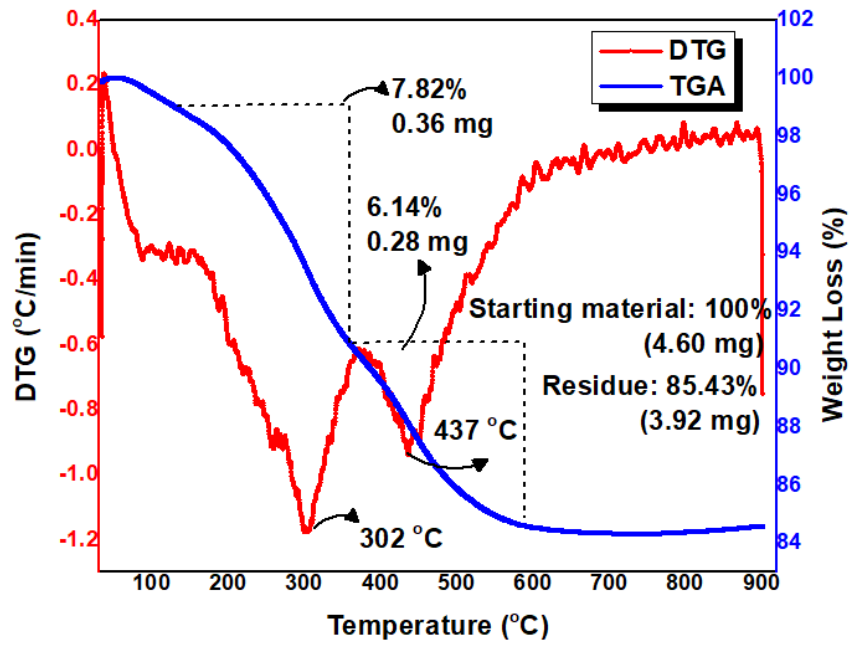

TG-DTA analysis of magnetic NpFeSi C6:10

## Ionic magnetic core-shell nanoparticles for DNA extraction

*Tammar Hussein Ali,<sup>1,2\*</sup> Amar Mousa Mandal<sup>3</sup>, Thorsten Heidelberg,<sup>1\*</sup> Rusnah Syahila Duali  
Hussen<sup>1</sup>, and Ean Wai Goh<sup>1</sup>*

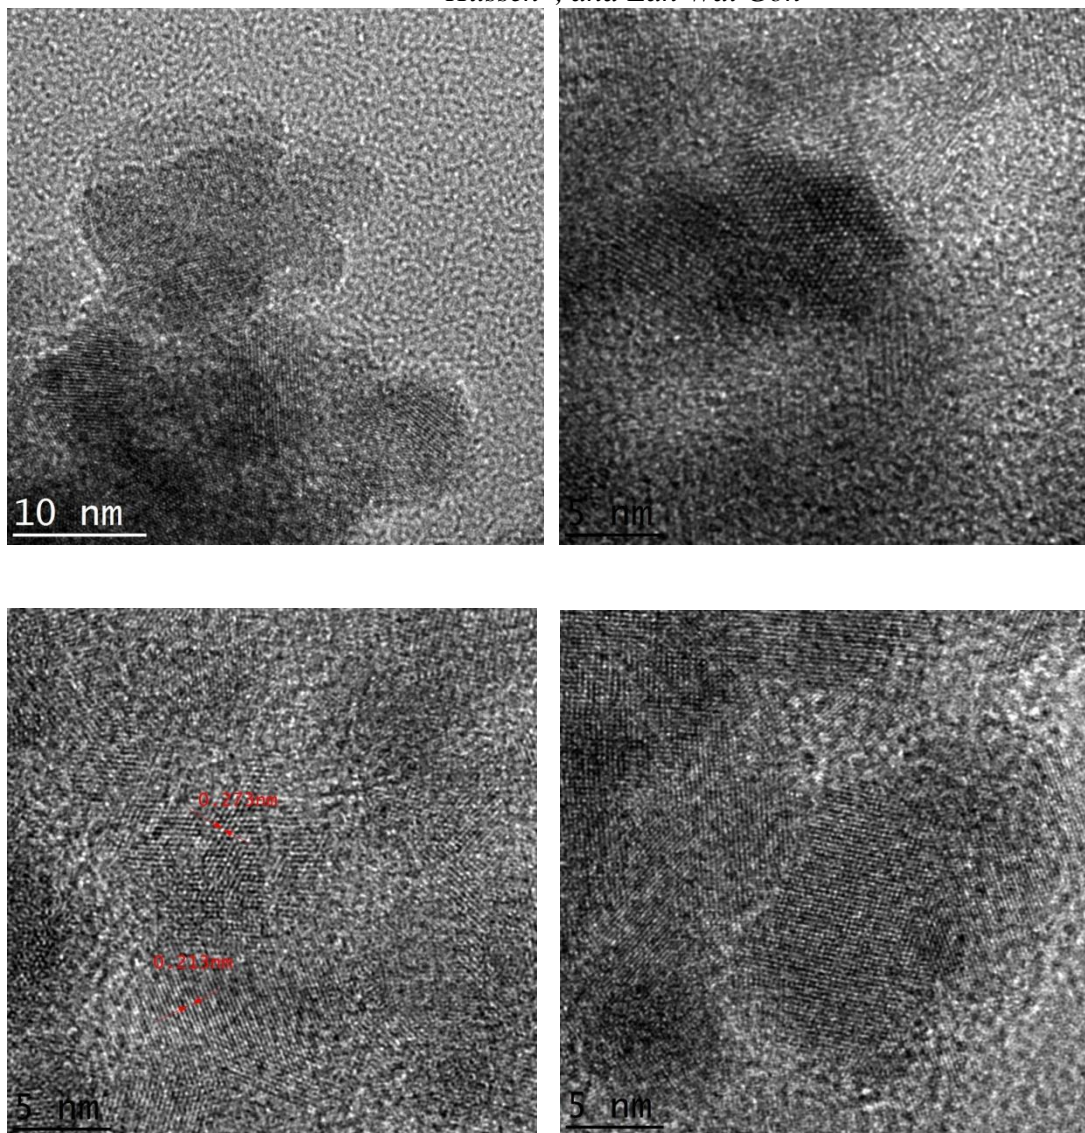

FESEM images of NpFeSiImR.

## Ionic magnetic core-shell nanoparticles for DNA extraction

Tammar Hussein Ali,<sup>1,2\*</sup> Amar Mousa Mandal<sup>3</sup>, Thorsten Heidelberg,<sup>1\*</sup> Rusnah Syahila Duali Hussen<sup>1</sup>, and Ean Wai Goh<sup>1</sup>

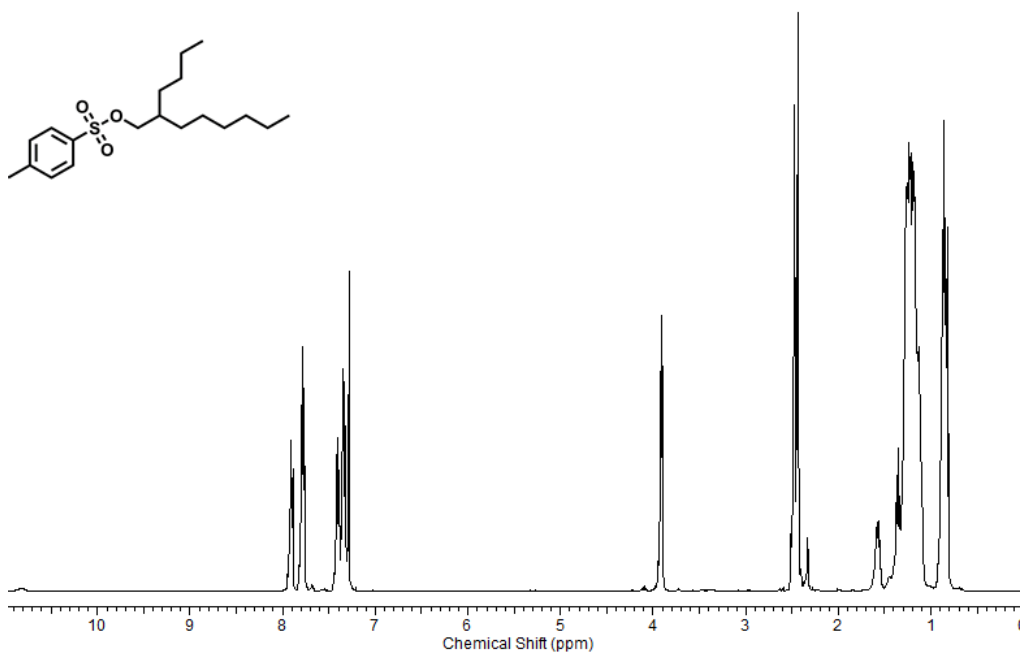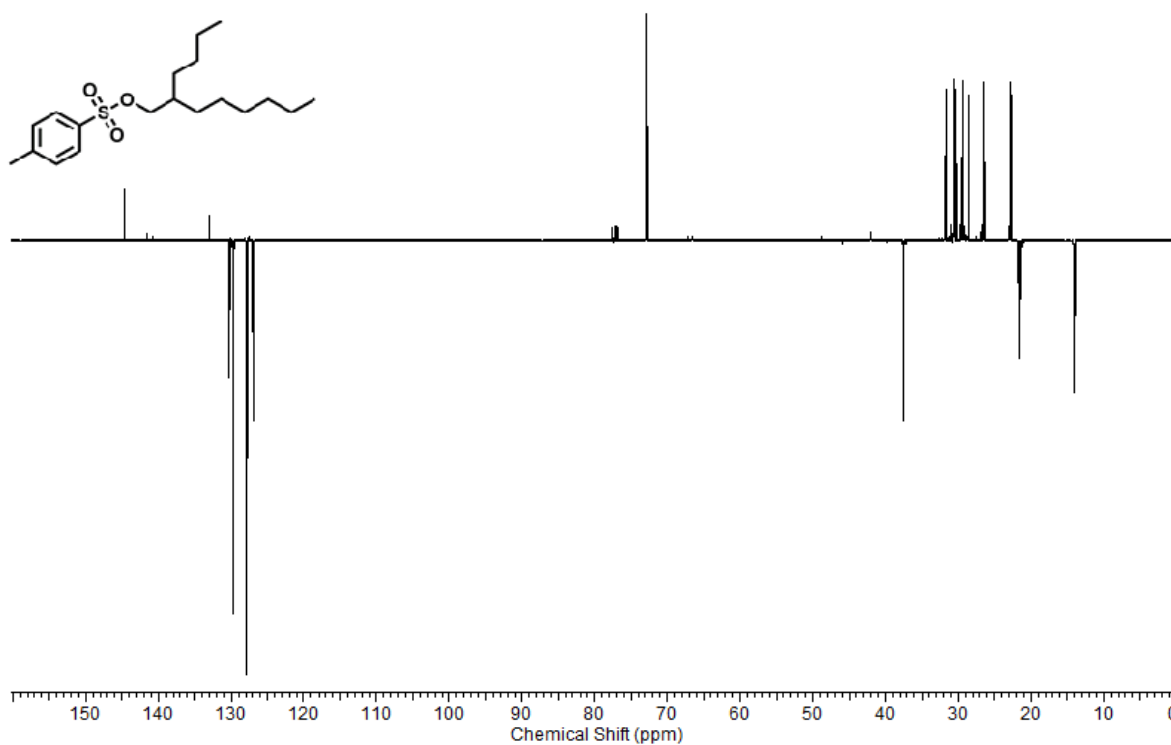

## Ionic magnetic core-shell nanoparticles for DNA extraction

Tammar Hussein Ali,<sup>1,2\*</sup> Amar Mousa Mandal<sup>3</sup>, Thorsten Heidelberg,<sup>1\*</sup> Rusnah Syahila Duali Hussen<sup>1</sup>, and Ean Wai Goh<sup>1</sup>

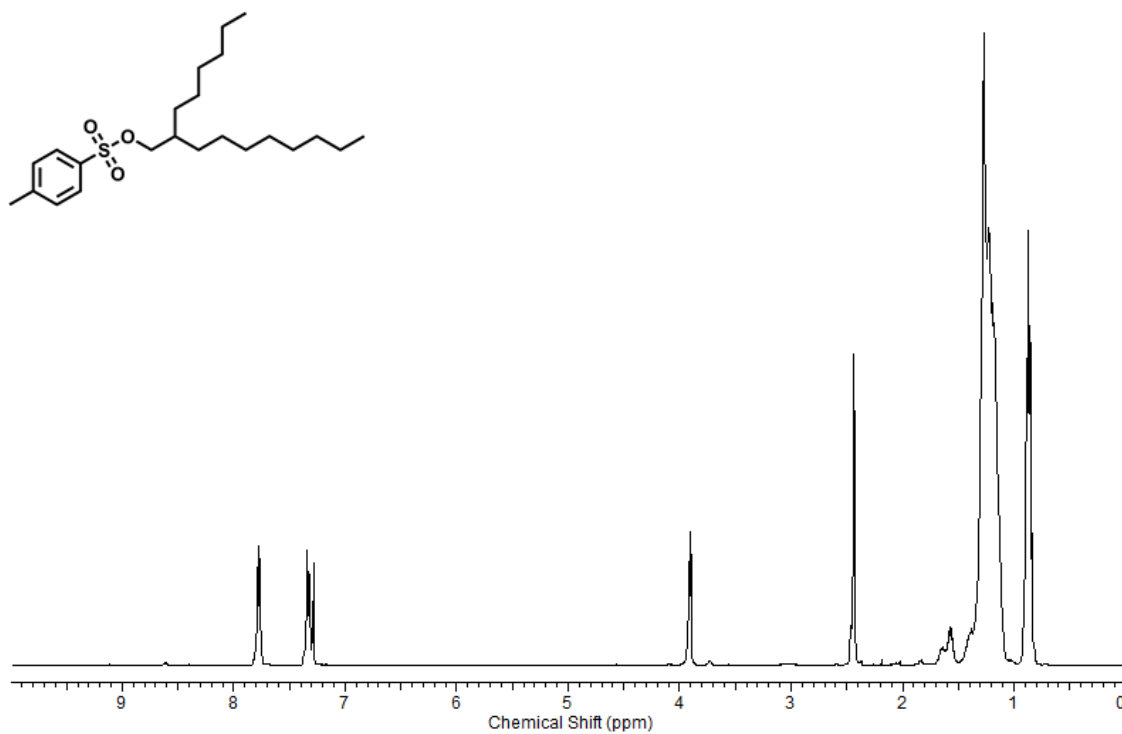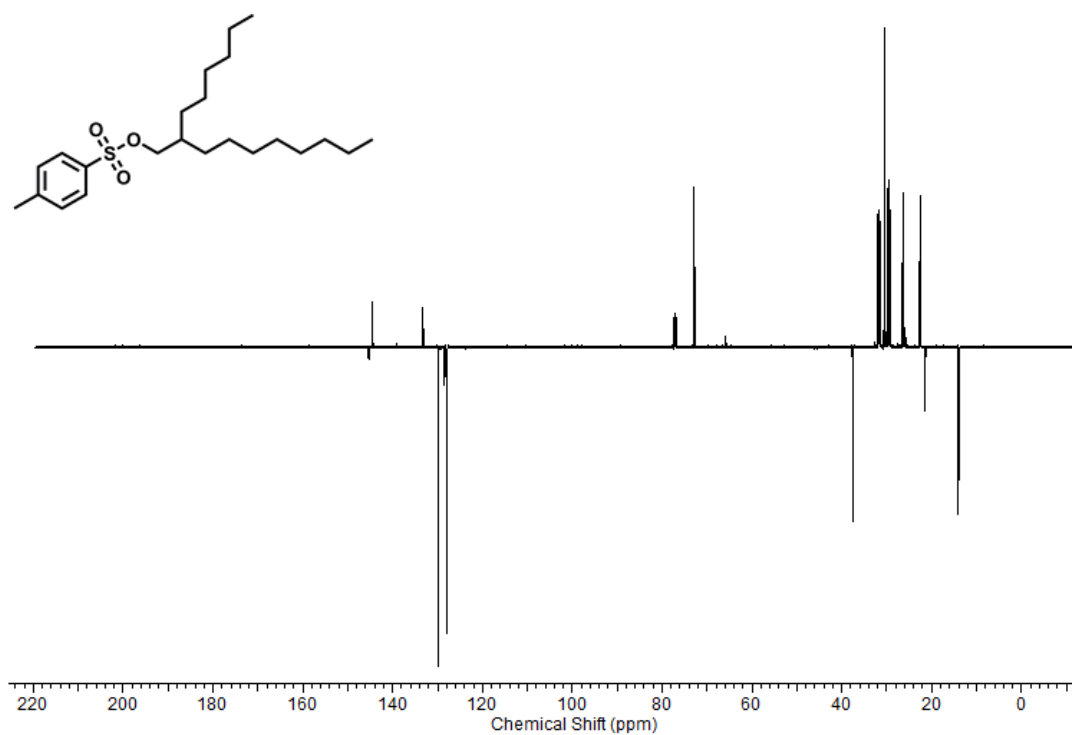

## Ionic magnetic core-shell nanoparticles for DNA extraction

Tammar Hussein Ali,<sup>1,2\*</sup> Amar Mousa Mandal<sup>3</sup>, Thorsten Heidelberg,<sup>1\*</sup> Rusnah Syahila Duali Hussen<sup>1</sup>, and Ean Wai Goh<sup>1</sup>

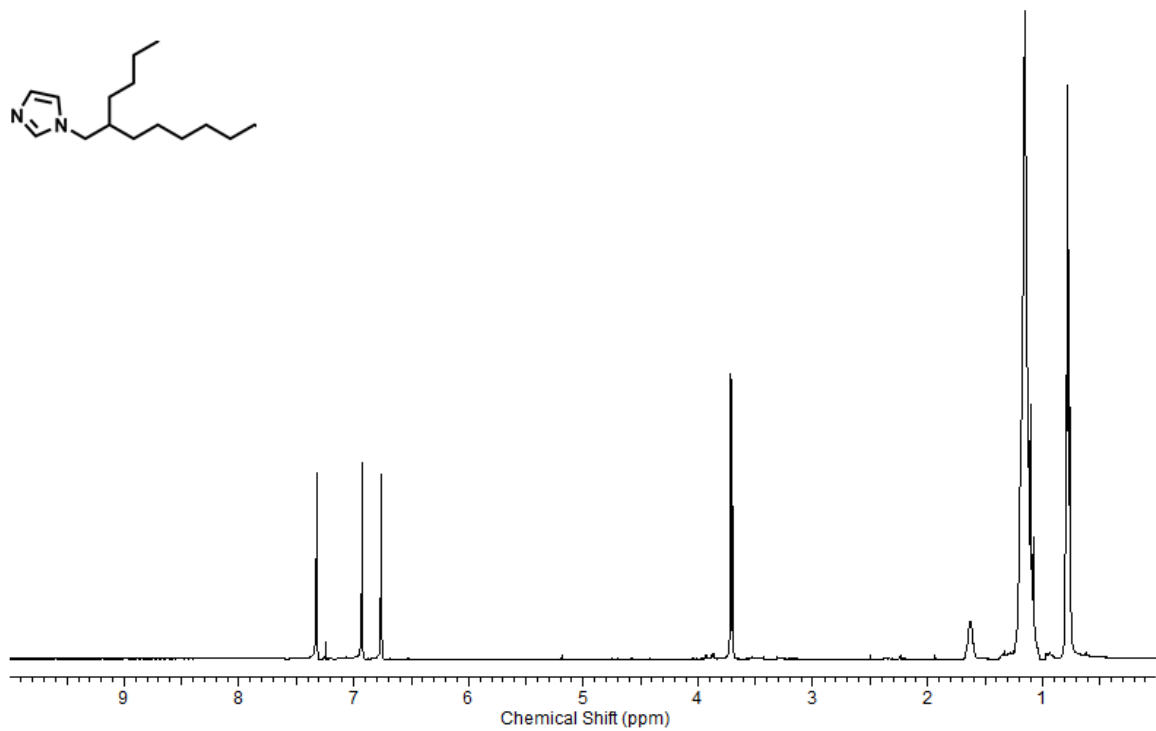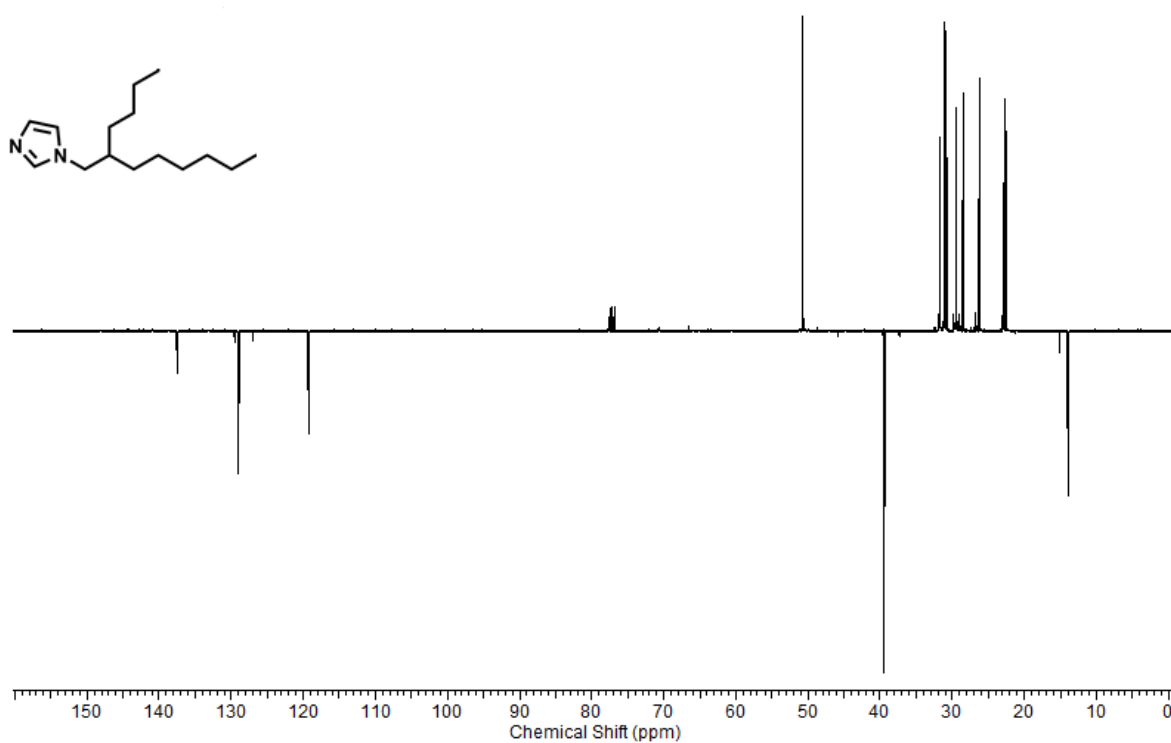



## Ionic magnetic core-shell nanoparticles for DNA extraction

Tammar Hussein Ali,<sup>1,2\*</sup> Amar Mousa Mandal<sup>3</sup>, Thorsten Heidelberg,<sup>1\*</sup> Rusnah Syahila Duali Hussen<sup>1</sup>, and Ean Wai Goh<sup>1</sup>

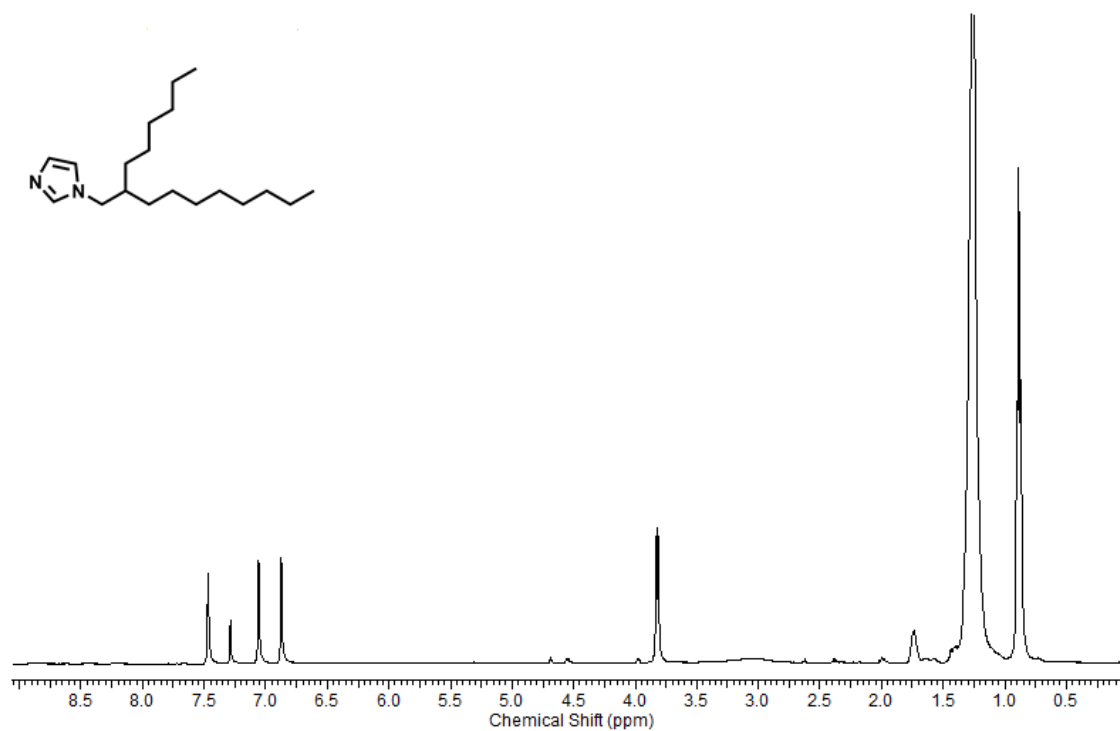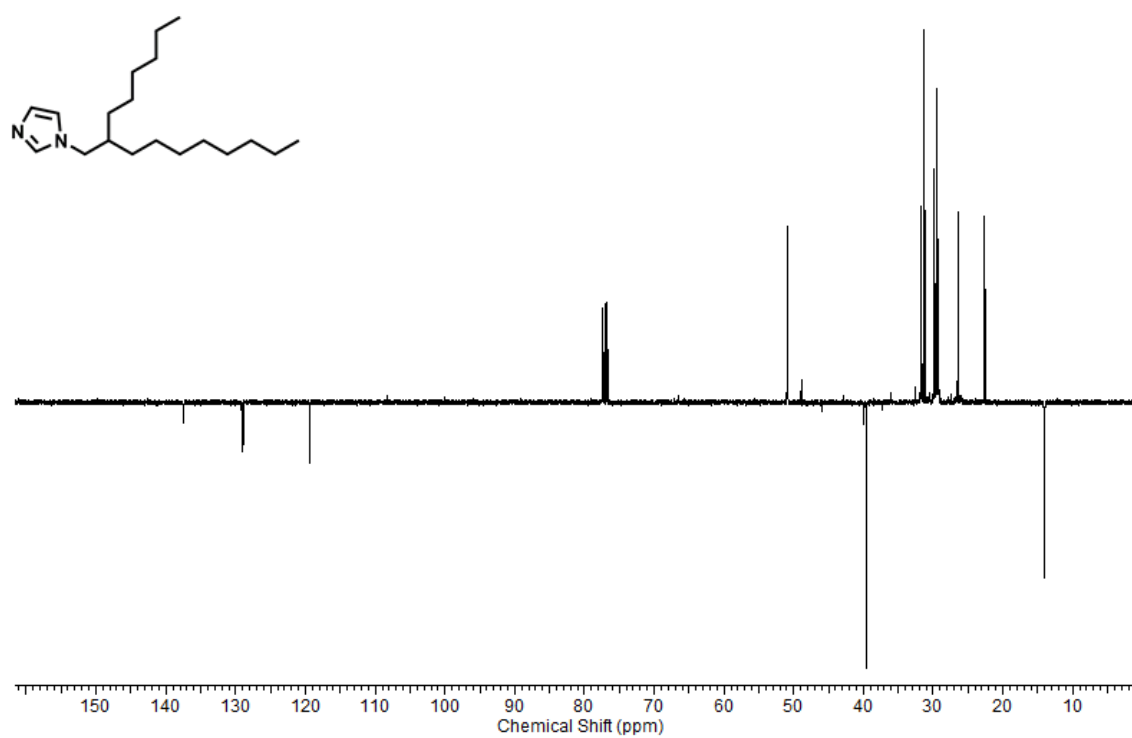

Supplement: d0ra05933a1.pdf [file d0ra05933a1.pdf]
